# Supplementary material for: Determination of uric acid in biological samples by high performance liquid chromatography-electrospray ionization-tandem mass spectrometry and study on pathogenesis of pulmonary arterial hypertension in pulmonary artery endothelium cells
Source: Royal Society of Chemistry journal article supplement (doi:10.1039/c7ra12702b), 2018-01-01
Supplement: c7ra12702b1.pdf [file c7ra12702b1.pdf]

Supplementary Information

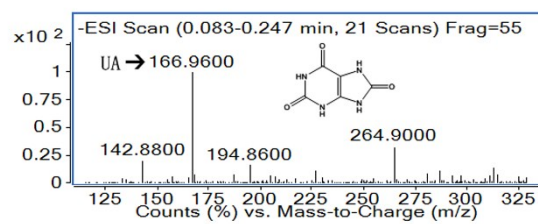

Figure 1. Full scan negative ion ESI Mass Spectrum and the chemical structure of UA;

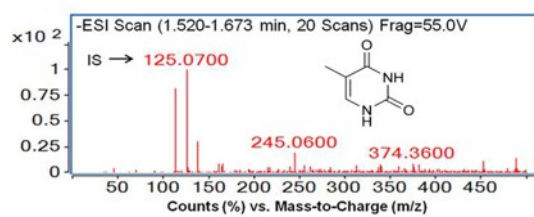

**Figure 2.** Full scan negative ESI mass spectrum and the chemical structure of I.S..

**Table 1.** Regression equations, Linearity ranges and LLOQs results for determination of uric acid in biological samples

| Biological samples | Concentration Ratio       |                             | Peak       | Regression Equation | R <sup>2</sup> | Linear Rang    | LLOQ |
|--------------------|---------------------------|-----------------------------|------------|---------------------|----------------|----------------|------|
|                    | Concentration value of UA | Concentration value of I.S. | Area Ratio |                     |                |                |      |
| Serum (ng/ml)      | 0.00                      | 40                          | 0.234      | Y=0.3016X+0.234     | 0.9991         | 1.0~<br>350.0  | 1.05 |
|                    | 1.05                      | 40                          | 0.251      |                     |                |                |      |
|                    | 3.66                      | 40                          | 0.269      |                     |                |                |      |
|                    | 12.80                     | 40                          | 0.331      |                     |                |                |      |
|                    | 32.00                     | 40                          | 0.468      |                     |                |                |      |
|                    | 80.00                     | 40                          | 0.845      |                     |                |                |      |
|                    | 200.00                    | 40                          | 1.674      |                     |                |                |      |
|                    | 350.00                    | 40                          | 2.911      |                     |                |                |      |
| Lung (ng/ml)       | 0.0000                    | 80                          | 0.003      | Y=0.7074X+0.003     | 0.9984         | 1.5~<br>1500.0 | 1.5  |
|                    | 1.5                       | 80                          | 0.014      |                     |                |                |      |
|                    | 3.0                       | 80                          | 0.03       |                     |                |                |      |
|                    | 6.0                       | 80                          | 0.06       |                     |                |                |      |
|                    | 30.0                      | 80                          | 0.31       |                     |                |                |      |
|                    | 150.0                     | 80                          | 1.33       |                     |                |                |      |
|                    | 750.0                     | 80                          | 7.04       |                     |                |                |      |
|                    | 1500.0                    | 80                          | 13.06      |                     |                |                |      |
| PAECs (ng/ml)      | 0.0000                    | 80                          | 0.004      | Y=0.9586X+0.004     | 0.9994         | 1.5~<br>1500.0 | 1.5  |
|                    | 1.5                       | 80                          | 0.012      |                     |                |                |      |
|                    | 3.0                       | 80                          | 0.024      |                     |                |                |      |
|                    | 6.0                       | 80                          | 0.058      |                     |                |                |      |
|                    | 30.0                      | 80                          | 0.30       |                     |                |                |      |
|                    | 150.0                     | 80                          | 1.55       |                     |                |                |      |
|                    | 750.0                     | 80                          | 8.76       |                     |                |                |      |
|                    | 1500.0                    | 80                          | 18.12      |                     |                |                |      |

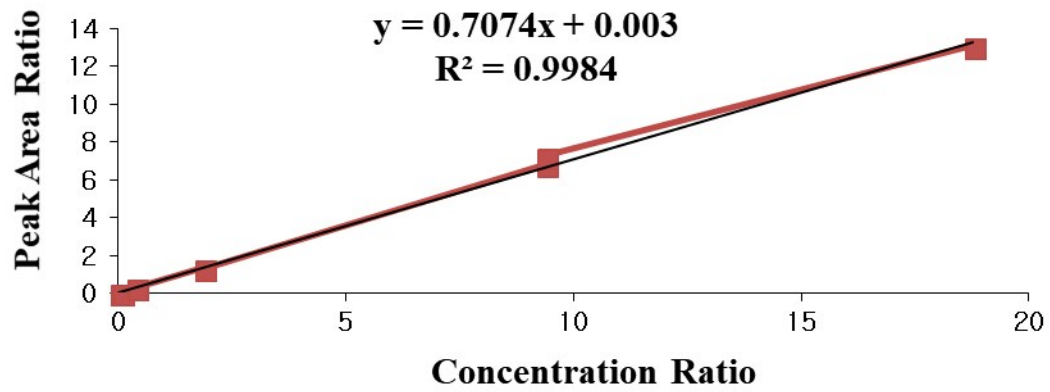

Figure 3. The calibration graph of UA in lung tissue.  $R^2$  (correlation coefficient) were equal to 0.9984.

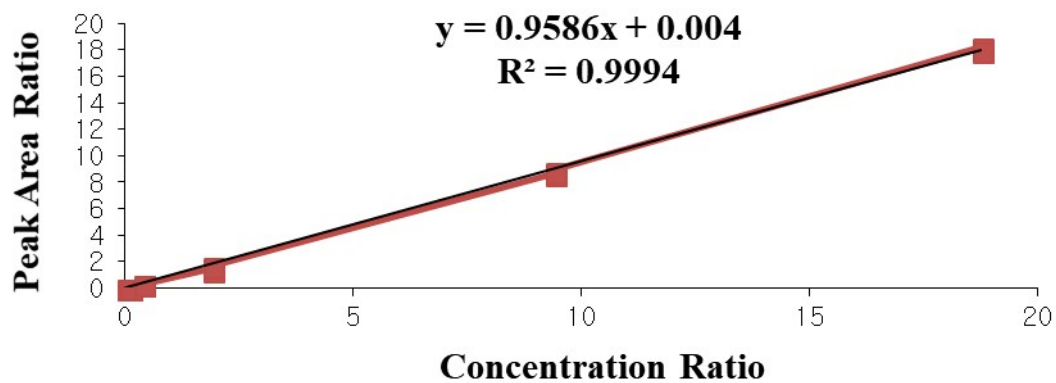

Figure 4. The calibration graph of UA in PAECs.  $R^2$  (correlation coefficient) were equal to 0.9994.

## RSC Advances

## ARTICLE

**Table 2.** Intra-day and inter-day precisions and accuracies for the determination of uric acid in biological samples of normal group. Mean  $\pm$  SD (n=6).

| Biological samples | Spiked Conc. | Measured Conc      | Intra-Day accuracy (RE%) | Intra-Day precision (RSD%) | Measured Conc      | Inter-day accuracy (RE%) | Inter-day precision (RSD%) |
|--------------------|--------------|--------------------|--------------------------|----------------------------|--------------------|--------------------------|----------------------------|
| Serum (ng/mL)      | 0.1          | 0.1 $\pm$ 0.0      | 103.8                    | 7.0                        | 0.1 $\pm$ 0.0      | 93.9                     | 7.7                        |
|                    | 10.0         | 9.7 $\pm$ 0.2      | 97.0                     | 2.1                        | 10.10 $\pm$ 0.3    | 101.0                    | 3.1                        |
|                    | 50.0         | 50.9 $\pm$ 1.4     | 101.8                    | 2.8                        | 50.50 $\pm$ 0.9    | 101.0                    | 1.8                        |
|                    | 200.0        | 199.8 $\pm$ 2.4    | 99.90                    | 1.2                        | 201.7 $\pm$ 3.7    | 100.0                    | 1.8                        |
| Lung (ng/mL)       | 1.5          | 1.3 $\pm$ 0.1      | 88.9                     | 7.8                        | 1.4 $\pm$ 0.1      | 91.3                     | 6.4                        |
|                    | 3.75         | 3.8 $\pm$ 0.2      | 101.8                    | 4.6                        | 3.7 $\pm$ 0.2      | 99.5                     | 4.3                        |
|                    | 67.50        | 77.2 $\pm$ 7.6     | 114.3                    | 9.8                        | 75.0 $\pm$ 2.0     | 111.1                    | 2.7                        |
|                    | 1200.0       | 1274.7 $\pm$ 124.7 | 105.3                    | 9.8                        | 1270.8 $\pm$ 26.6  | 105.9                    | 2.1                        |
| PAECs (ng/mL)      | 1.5          | 1.7 $\pm$ 0.0      | 112.7                    | 2.8                        | 1.6 $\pm$ 0.1      | 109.7                    | 5.4                        |
|                    | 3.75         | 3.8 $\pm$ 0.3      | 101.4                    | 8.7                        | 3.9 $\pm$ 0.2      | 103.0                    | 5.7                        |
|                    | 67.5         | 66.5 $\pm$ 2.5     | 98.4                     | 3.8                        | 63.2 $\pm$ 2.9     | 93.6                     | 4.7                        |
|                    | 1200.0       | 1155.5 $\pm$ 43.2  | 96.3                     | 3.7                        | 1101.3 $\pm$ 107.7 | 91.8                     | 9.8                        |

**Table 3.** Extraction recovery and matrix effect of the determination of uric acid in biological samples of normal group (n=6).

| Biological samples | Spiked Conc. | Recovery (%) | RSD (%) | Matrix effect (%) | RSD (%) |
|--------------------|--------------|--------------|---------|-------------------|---------|
| Serum<br>(ng/ml)   | 10.00        | 90.7         | 6.7     | 111.09            | 9.7     |
|                    | 50.00        | 86.2         | 9.0     | 106.88            | 6.3     |
|                    | 200.00       | 98.7         | 6.6     | 112.57            | 2.1     |
| Lung<br>(ng/ml)    | 3.75         | 90.9         | 7.2     | 114.49            | 8.9     |
|                    | 67.50        | 84.4         | 10.9    | 105.35            | 5.2     |
|                    | 1200.00      | 92.9         | 9.9     | 103.75            | 5.1     |
| PAECs<br>(ng/ml)   | 3.75         | 87.1         | 12.2    | 106.11            | 9.1     |
|                    | 67.50        | 86.6         | 7.3     | 110.37            | 10.4    |
|                    | 1200.00      | 80.7         | 5.2     | 108.06            | 7.6     |

**Table 4.** Stability results of the determination of uric acid in biological samples of normal group (n=6).

| Biological samples | Spiked Conc. | Measured Conc | RE (%) | RSD (%) |
|--------------------|--------------|---------------|--------|---------|
| Serum (ng/ml)      | 10.0         | 10.47         | 104.7  | 8.3     |
|                    | 200.00       | 215.24        | 107.6  | 1.0     |
| Lung (ng/ml)       | 3.75         | 3.7           | 98.5   | 2.7     |
|                    | 1200.00      | 1262.7        | 105.2  | 8.3     |
| PAECs (ng/ml)      | 3.75         | 3.6           | 96.4   | 2.8     |
|                    | 1200.00      | 1138.8        | 94.9   | 1.4     |
